# Supplementary material for: Fertilizer regimes reshape microbial interaction networks without altering sugarcane rhizosphere diversity
Source: Copernicus journal article supplement (doi:10.5194/egusphere-2026-629), 2026-02-18
Supplement: Supplementary file 1 [file egusphere-2026-629-supplement.pdf]

# Supplementary Figures

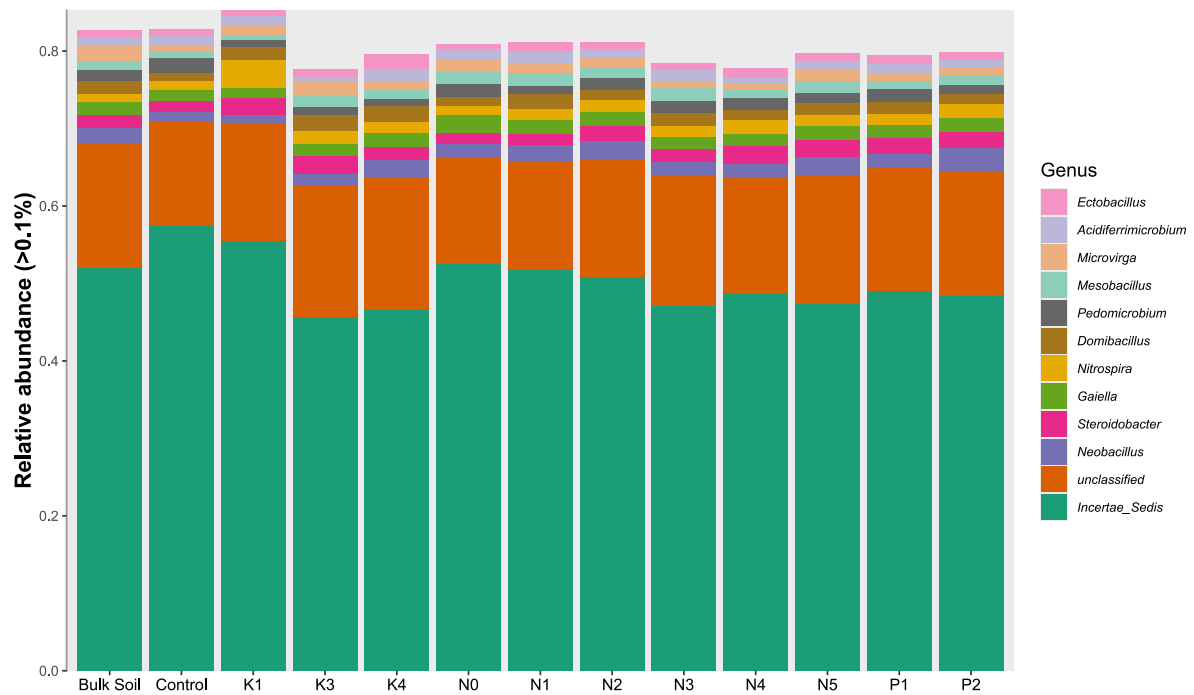

**Figure 1S.** Bacterial relative relative abundance at the genus level of all genera with relative abundance > 0.1% considering all unclassified and incertae sedis ASVs. Sample abbreviations: K1, medium potassium application; K3, high potassium application; K4, very high potassium application; N0, no nitrogen application; N1, low nitrogen application; N2, medium nitrogen application; N3, high nitrogen application; N4, very high nitrogen application; N5, low nitrogen application; P1, medium phosphorus application; P2, high phosphorus application.

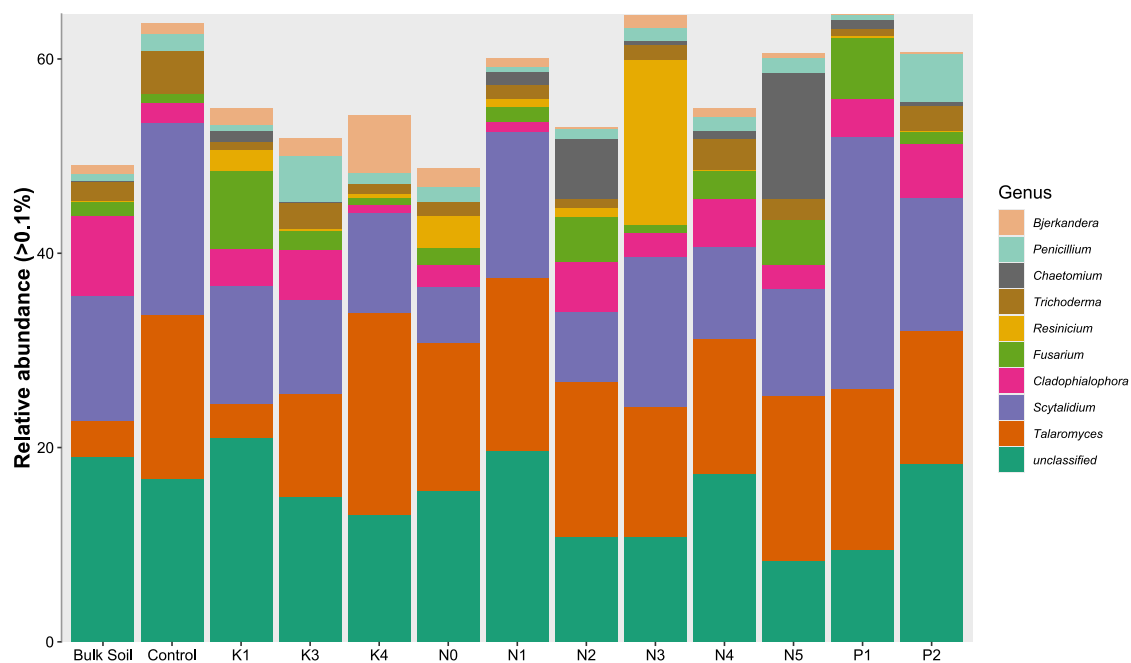

**Figure 2S.** Fungal relative relative abundance at the genus level of all genera with relative abundance > 0.1% considering all unclassified and incertae sedis ASVs. Sample abbreviations: K1, medium potassium application; K3, high potassium application; K4, very high potassium application; N0, no nitrogen application; N1, low nitrogen application; N2, medium nitrogen application; N3, high nitrogen application; N4, very high nitrogen application; N5, low nitrogen application; P1, medium phosphorus application; P2, high phosphorus application.

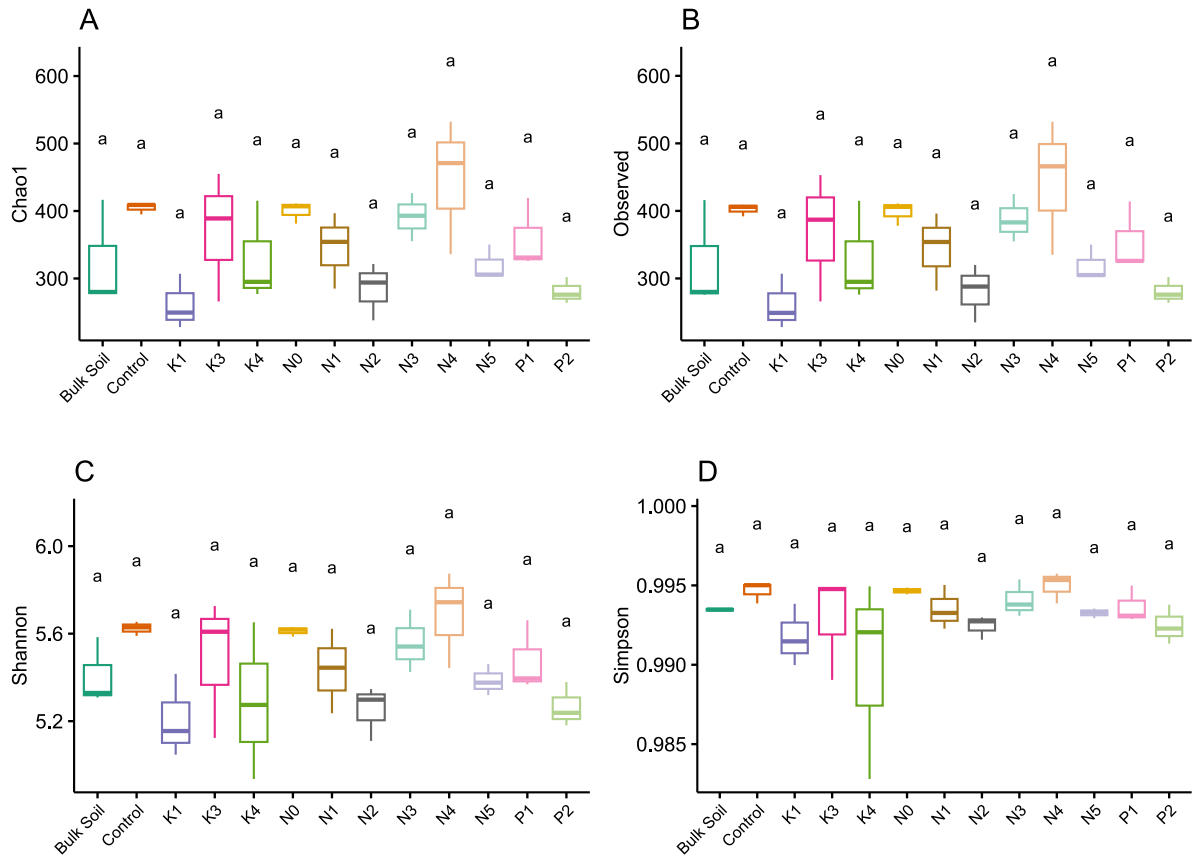

**Figure 3S.** Bacterial alpha diversity for rhizosphere and soil samples based on four indices (Chao1, A; Observed, B; Shannon, C; and Simpson, D). Kruskal–Wallis test, non-significant. Sample abbreviations: K1, medium potassium application; K3, high potassium application; K4, very high potassium application; N0, no nitrogen application; N1, low nitrogen application; N2, medium nitrogen application; N3, high nitrogen application; N4, very high N application; N5, low nitrogen application; P1, medium phosphorus application; P2, high phosphorus application.

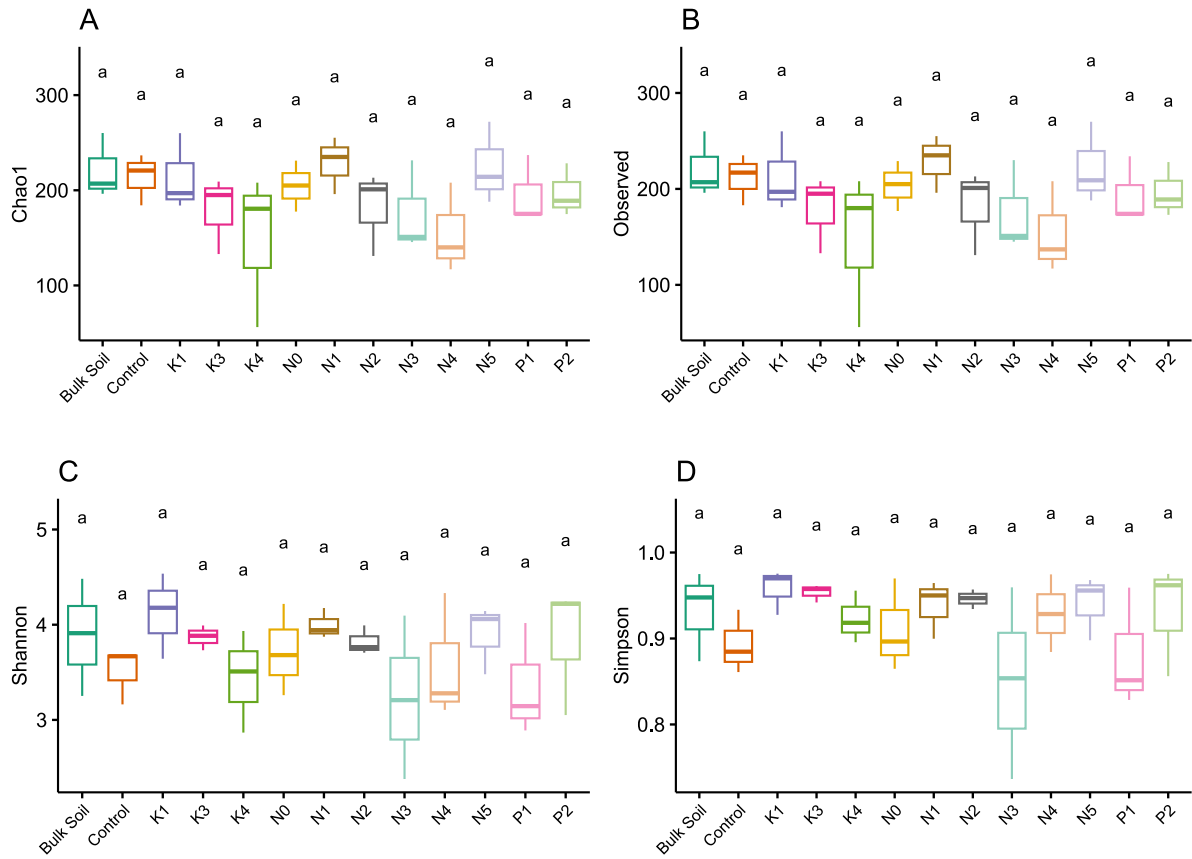

**Figure 4S.** Fungal alpha diversity for rhizosphere and soil samples based on four indices (Chao1, A; Observed, B; Shannon, C; and Simpson, D). Kruskal–Wallis test, non-significant. Sample abbreviations: K1, medium potassium application; K3, high potassium application; K4, very high potassium application; N0, no nitrogen application; N1, low nitrogen application; N2, medium nitrogen application; N3, high nitrogen application; N4, very high N application; N5, low nitrogen application; P1, medium phosphorus application; P2, high phosphorus application.

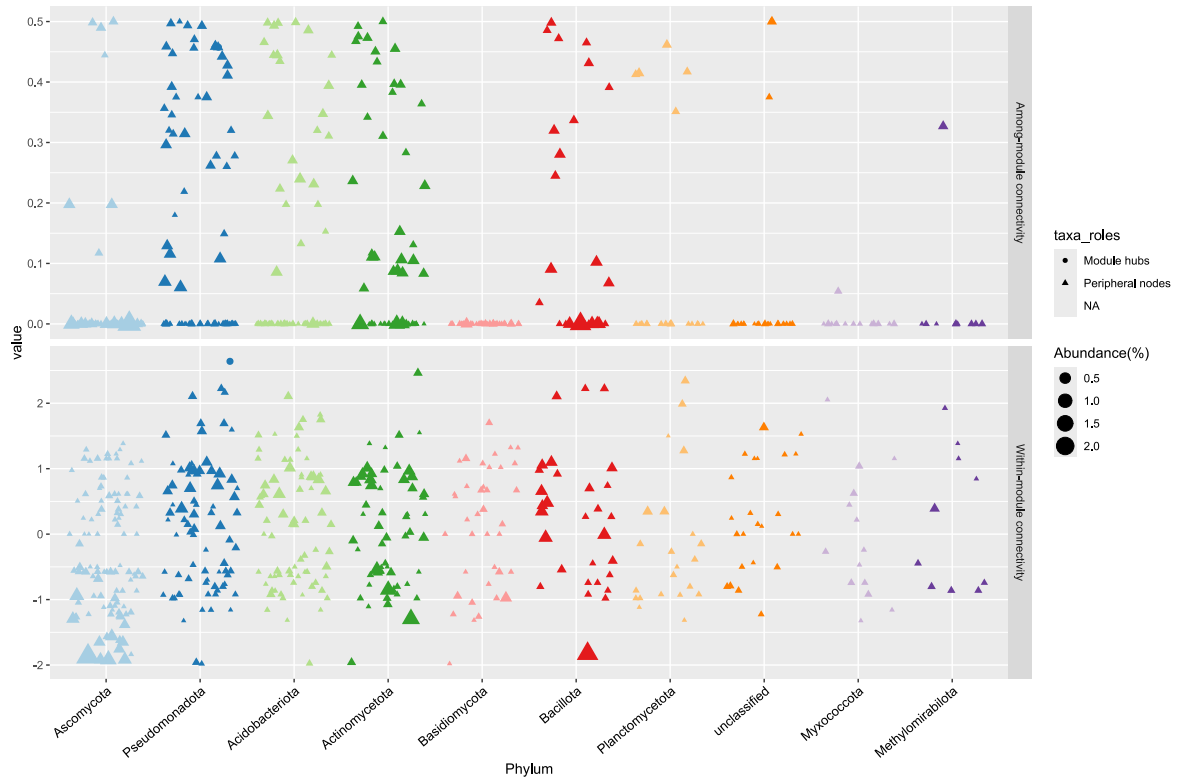

**Figure 5S.** Taxa roles on co-occurrence network of combined bacterial and fungal datasets. Upper panel, Among-module connectivity; lower panel, Within-module connectivity. Bigger figures represent higher relative abundance; shape represents taxa roles:  $Z_i \geq 2.5$ , module hubs;  $P_i \geq 0.62$ , connectors;  $Z_i$  and  $P_i \geq 2.5$ , network hubs. Otherwise, they were classified as Peripheral nodes.

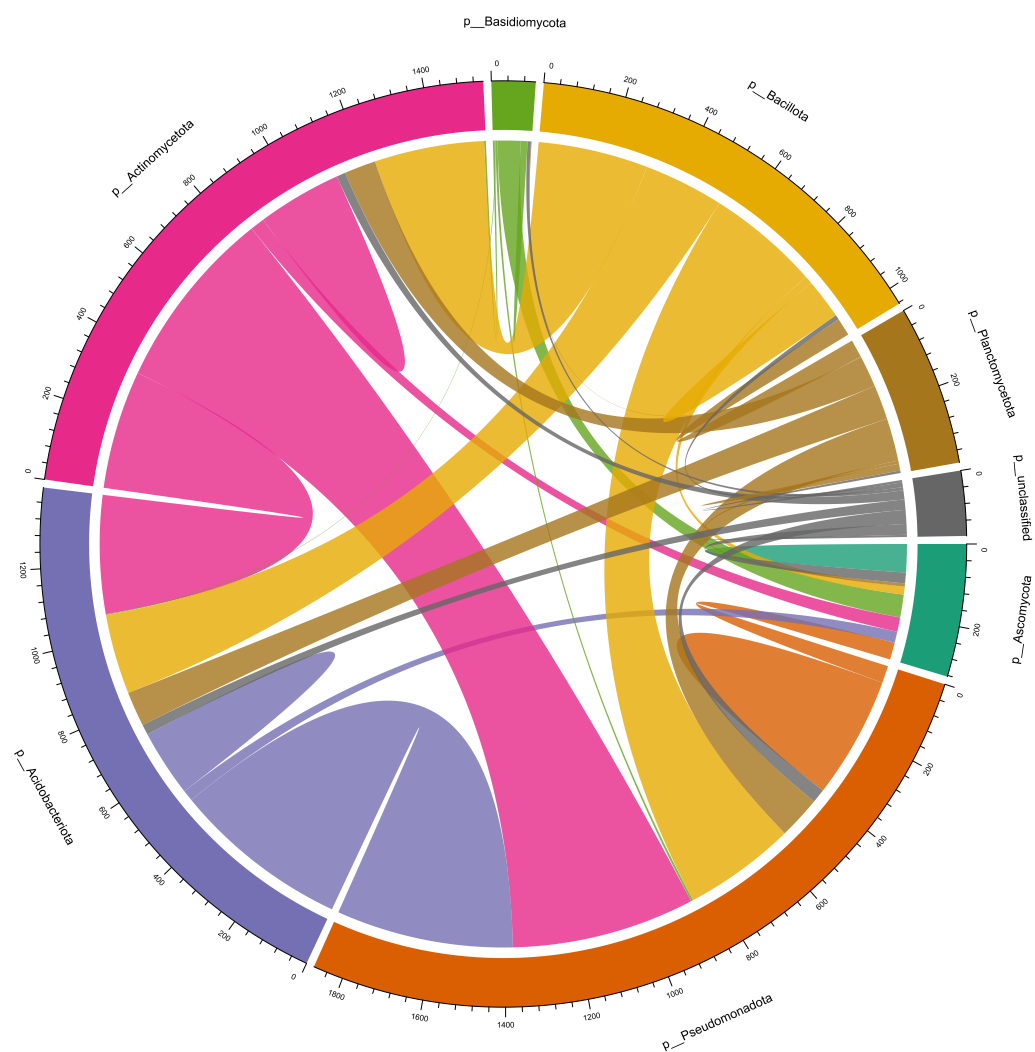

**Figure 6S.** Circular plot of connections between taxa at phylum level.

38  
39  
40

41  
42

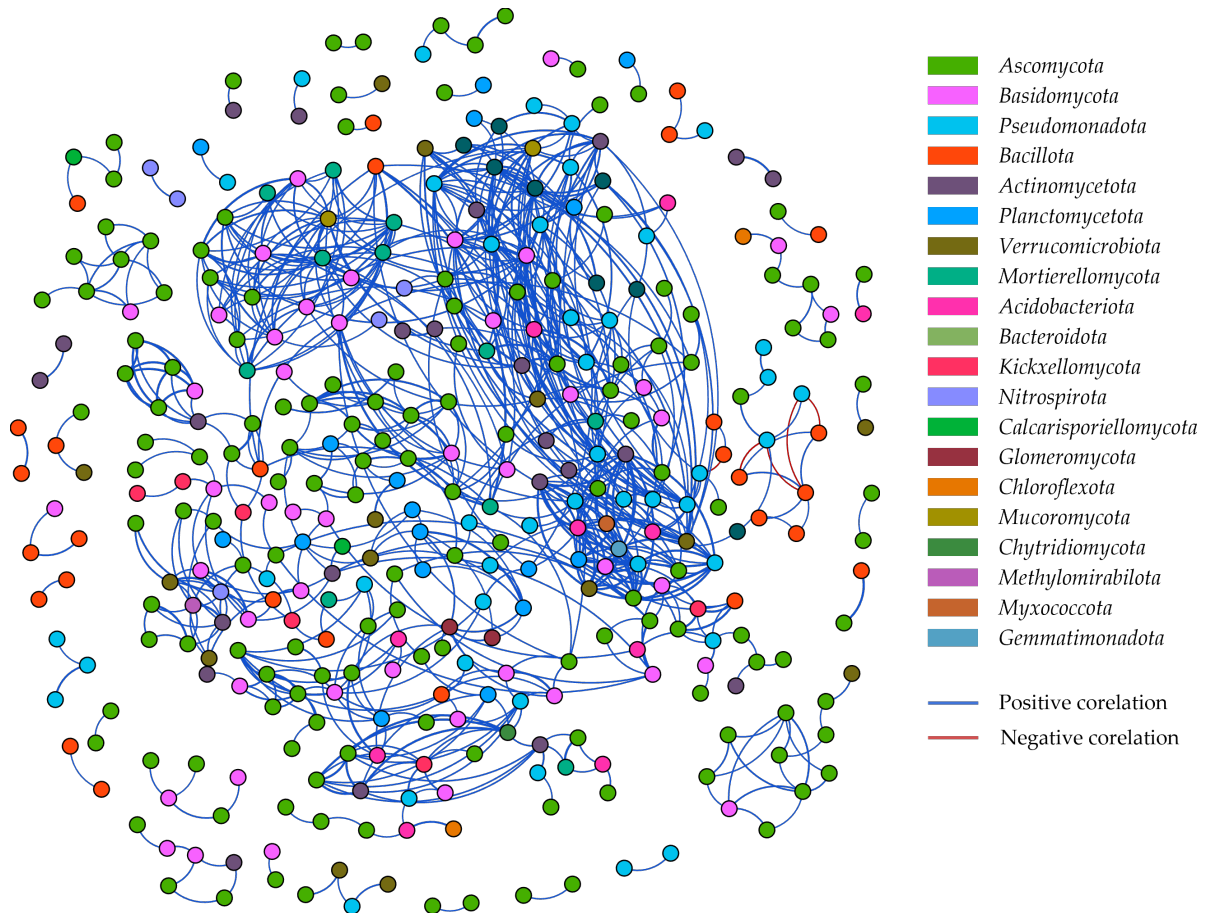

44

**Figure 7S. Microbial interaction network.** Bacterial and Fungal ASVs are graphed as nodes with node colors indicating the phylum, while the relationship between nodes is displayed as edges (positive relations, blue line; negative correlations, red). Significant positive Spearman correlations are graphed as edges ( $q > 0.6$ , false discovery rate adjusted  $P < 0.01$ , two-sided).

45

46

47

48

49

50

51

52

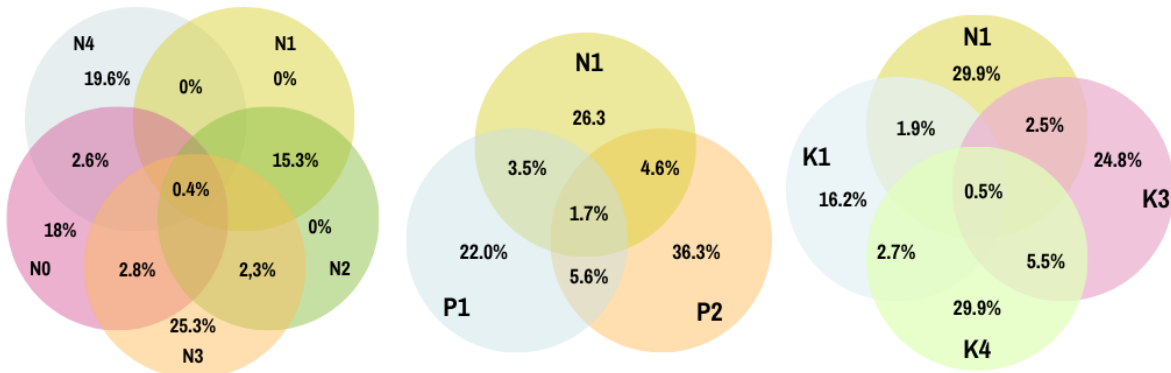

53

**Figure 8S.** Venn diagram of shared nodes from different fertilization regimes. Sample abbreviations: K1, medium potassium application; K3, high potassium application; K4, very high potassium application; N0, no nitrogen application; N1, low nitrogen application; N2, medium nitrogen application; N3, high nitrogen application; N4, very high N application; N5, low nitrogen application; P1, medium phosphorus application; P2, high phosphorus application.

54

55

56

57

58



Supplementary table 1. Yield of culture sites of long-term fertilization trial at the Sugar Cane Research Institute in Santiago de Cuba.

| Site code | Fertilization regime                             | Yield of site (Ton/ha) |
|-----------|--------------------------------------------------|------------------------|
| Control   | Bulk soil<br>(no rhizosphere)                    | N/A                    |
| Blank     | Rhizosphere<br>(no fertilization)                | 76.2                   |
| N0        | N <sub>0</sub> P <sub>25</sub> K <sub>50</sub>   | 95.9                   |
| N1        | N <sub>50</sub> P <sub>25</sub> K <sub>50</sub>  | 96.5                   |
| N2        | N <sub>100</sub> P <sub>25</sub> K <sub>50</sub> | 95.3                   |
| N3        | N <sub>150</sub> P <sub>25</sub> K <sub>50</sub> | 82.5                   |
| N4        | N <sub>200</sub> P <sub>25</sub> K <sub>50</sub> | 83.5                   |
| N5        | N <sub>50</sub> P <sub>0</sub> K <sub>0</sub>    | 87.7                   |
| P1        | N <sub>50</sub> P <sub>75</sub> K <sub>50</sub>  | 97.4                   |
| P2        | N <sub>50</sub> P <sub>10</sub> K <sub>50</sub>  | 96.3                   |
| K1        | N <sub>50</sub> P <sub>25</sub> K <sub>100</sub> | 98.2                   |
| K3        | N <sub>50</sub> P <sub>25</sub> K <sub>200</sub> | 98.8                   |
| K4        | N <sub>50</sub> P <sub>25</sub> K <sub>300</sub> | 99.6                   |
